# Supplementary material for: LGALS4 as a Prognostic Factor in Urothelial Carcinoma of Bladder Affects Cell Functions
Source: PubMed Central journal article supplement — Technol Cancer Res Treat. 2019 Sep 26;18:1533033819876601. doi: 10.1177/1533033819876601 (PMC6767717; doi:10.1177/1533033819876601), 2019-09-26
Supplement: Table_S1.pdf [file Table_S1.pdf]

**Table S1 Clinicopathological characteristics of 412 patients with urothelial carcinoma of bladder**

| Parameters                          | Group         | Cases |
|-------------------------------------|---------------|-------|
| Gender                              | Male          | 304   |
|                                     | Female        | 108   |
| Age at initial pathologic diagnosis | <55           | 43    |
|                                     | ≥55           | 369   |
| Diagnosis subtype                   | Papillary     | 133   |
|                                     | Non-Papillary | 274   |
|                                     | NA            | 5     |
| Pathologic stage                    | Stage I/II    | 133   |
|                                     | Stage III/IV  | 277   |
|                                     | NA            | 2     |
| Neoplasm histologic grade           | Low           | 21    |
|                                     | High          | 388   |
|                                     | NA            | 3     |
| Lymph node metastasis               | Absent        | 79    |
|                                     | Present       | 296   |
|                                     | NA            | 37    |
| Lymphovascular invasion             | Absent        | 113   |
|                                     | Present       | 181   |
|                                     | NA            | 118   |

NA, not available, the data is missing.
